# Supplementary material for: Comparison of Antiplatelet Effects of Phenol Derivatives in Humans
Source: MDPI journal article supplement (doi:10.3390/biom12010117), 2022-01-12
Supplement: s1 [file s1]

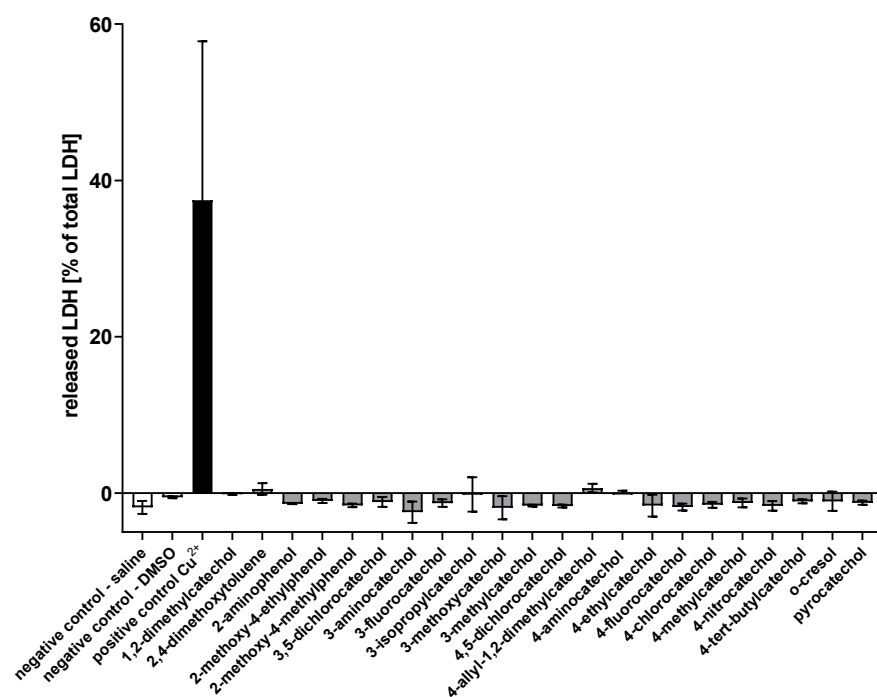

**Figure S1.** Effect of the tested compounds on human erythrocytes. Tested compounds or their solvents DMSO or saline were incubated with human purified erythrocytes for 4 h at 37 °C. The lysis of erythrocytes was measured by release of lactate dehydrogenase. Cupric ions at a final concentration of 500  $\mu$ M was used as a positive control. Most compounds were dissolved in saline with the exception of 3-isopropylcatechol, 4-allyl-1,2-dimethylcatechol, 1,2-dimethylcatechol and 2,4-dimethoxytoluene that were dissolved in DMSO. *o*-Toluidin was not tested in this assay.

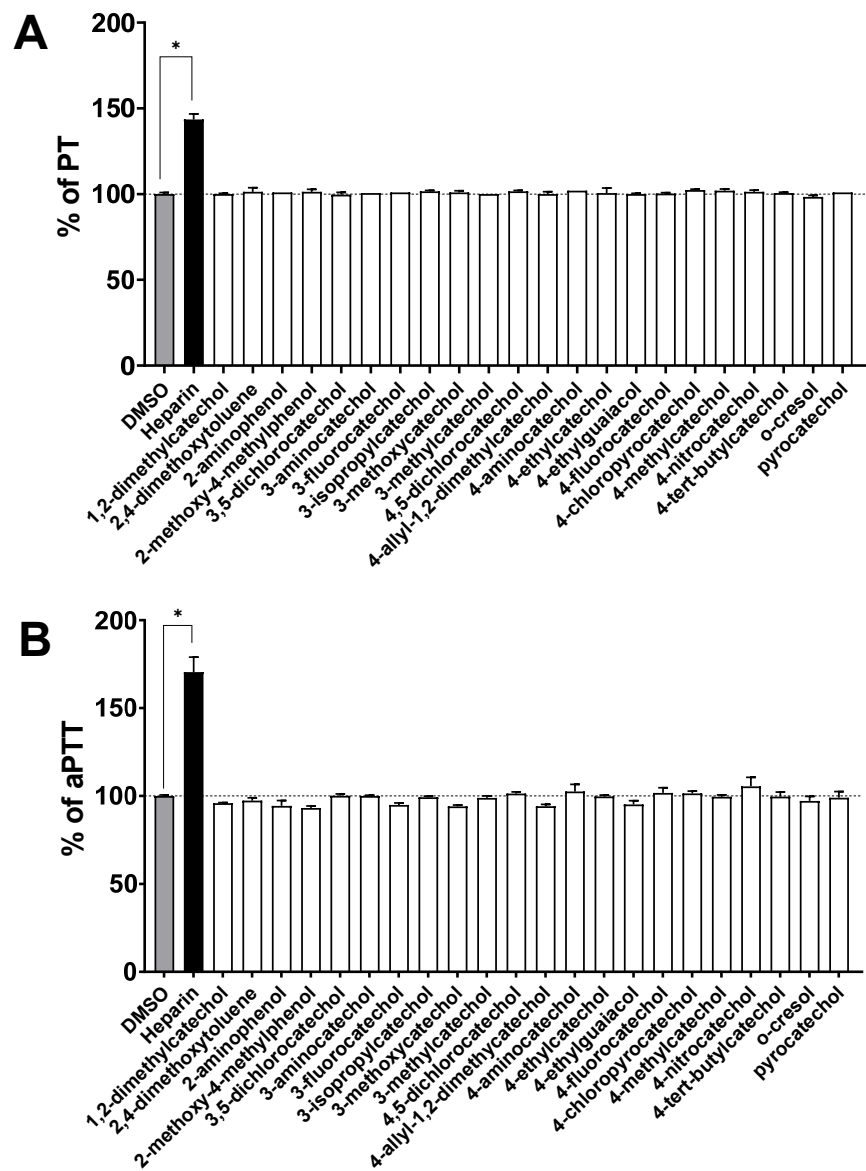

**Figure S2.** Effect of tested compounds on blood coagulation. Prothrombin time (PT) and activated partial thromboplastin time (aPTT) values of the tested compounds at final concentration of 100  $\mu$ M were determined using Ceveron® coagulometer. For both methods, DMSO 1% was used as vehicle (an also as a negative control) and heparin as positive control at a final concentration 0.005 IU/mL and 0.0005 IU/mL for PT and aPTT, respectively. \* $p < 0.001$ .

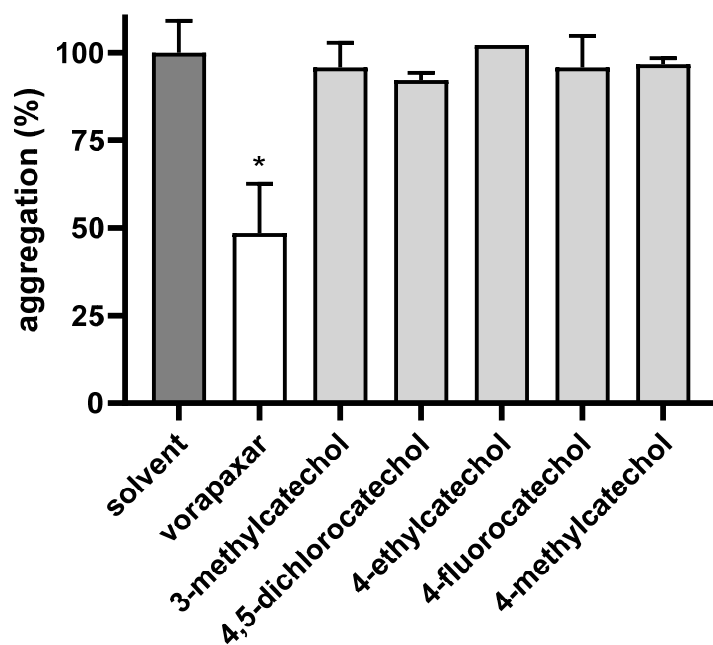

**Figure S3.** Effect of selected most active compounds on TRAP induced platelet aggregation. Blood aggregation was triggered by adding TRAP, concentration of tested compounds was 250  $\mu$ M, except for vorapaxar which was investigated at 1.5  $\mu$ M. Values represented as means with SD. \* $p < 0.05$  vs. DMSO.
